# Supplementary material for: Insights into coloration enhancement of mercerized cotton fabric on reactive dye digital inkjet printing
Source: Royal Society of Chemistry journal article supplement (doi:10.1039/d2ra01053d), 2022-01-01
Supplement: d2ra01053d1.pdf [file d2ra01053d1.pdf]

## Supporting Information

# Insights into coloration enhancement of mercerized cotton fabric on reactive dye digital inkjet printing

*Hongzhi Zhao,<sup>a</sup> Kun Zhang,<sup>a</sup> Kuanjun Fang,<sup>a,b</sup> Furui Shi,<sup>a</sup> Ying Pan,<sup>a</sup> Fuyun Sun,<sup>c</sup>*

*Dezhen Wang,<sup>d</sup> Ruyi Xie,<sup>a,b\*</sup> Weichao Chen<sup>a,b\*</sup>*

<sup>a</sup> College of Textiles & Clothing, State Key Laboratory for Biofibers and Eco-textiles, Collaborative Innovation Center for Eco-textiles of Shandong Province, Qingdao University, Qingdao 266071, China

<sup>b</sup> National Innovation Center of Advanced Dyeing and Finishing Technology, Tai'an, Shandong 271000, P.R.China

<sup>c</sup> YuYue Home Textile Company, 1 Xiner Road, Bincheng District, Binzhou, 256600, China

<sup>d</sup> Lufeng Company Limited, Zibo 255100, China

\* Corresponding author. Qingdao University, 308 Ningxia Road, Qingdao 266071, China

E-mail address: xry1228@126.com

E-mail address: chenwc@qdu.edu.cn

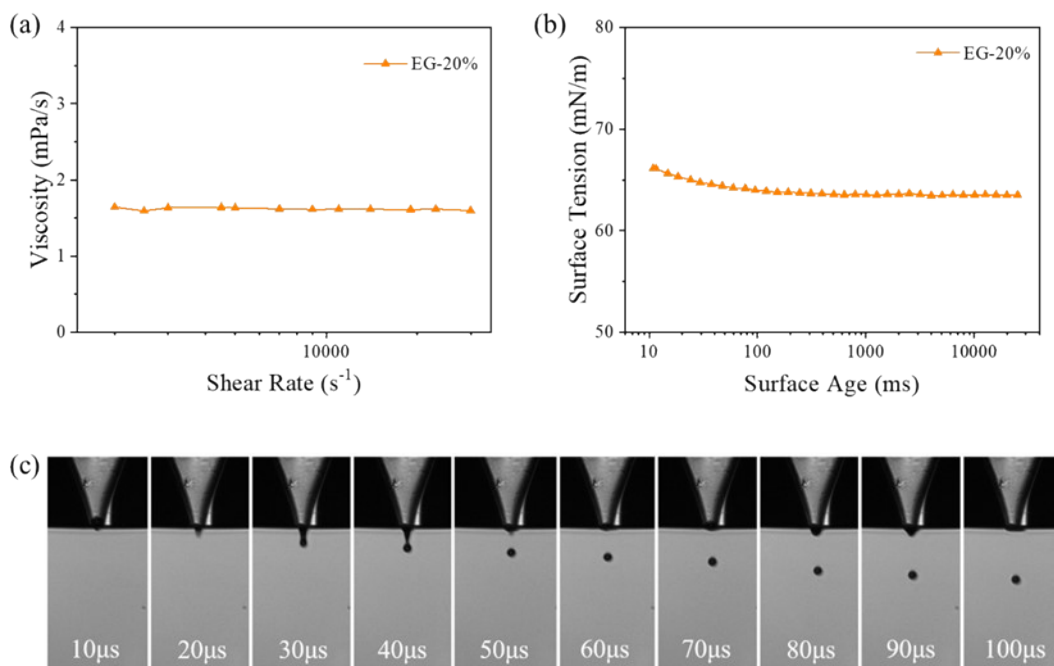

**Fig. S1.** (a) Viscosity, (b) surface tension and (c) droplet morphology of Reactive Orange 13 ink.

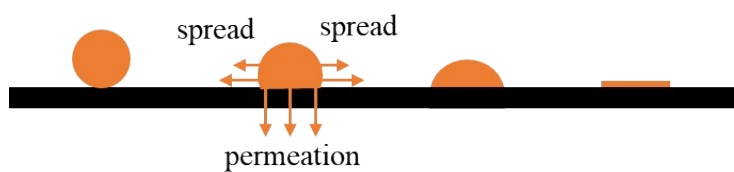

**Fig. S2.** Schematic diagram of ink droplet penetration on fabrics, penetration process of droplets on fabrics.

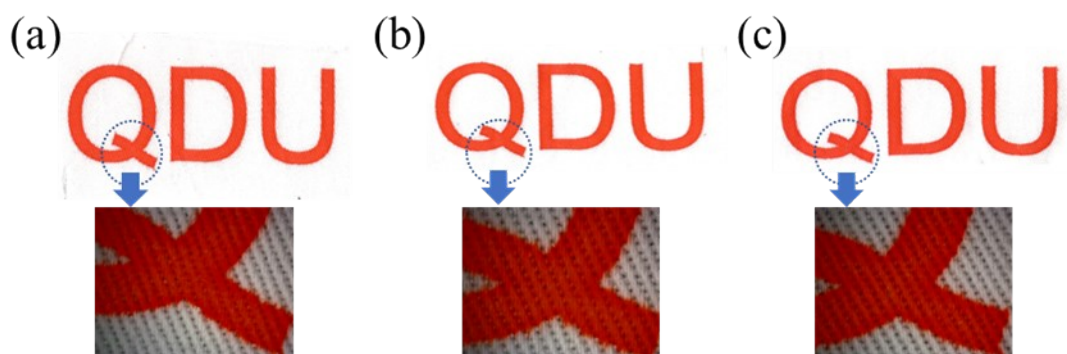

**Fig. S3.** The outline sharpness of ink-jet printed cotton fabrics treated with alkali: (a) 0 s, (b) 10 s, (c) 60 s.
